1 A family of cell wall transglutaminases is essential for appressorium develop-  
2 ment and pathogenicity in *Phytophthora infestans*

3 Maja Brus-Szkalej<sup>1\*</sup>, Christian B. Andersen<sup>1</sup>, Ramesh R. Vetukuri<sup>2</sup> and Laura J. Grenville-  
4 Briggs<sup>1</sup>

5  
6 <sup>1</sup> Department of Plant Protection Biology, Swedish University of Agricultural Sciences, Box  
7 190, 234 22 Lomma, Sweden

8 <sup>2</sup> Department of Plant Breeding, Swedish University of Agricultural Sciences, Box 190, 234  
9 22 Lomma, Sweden

10 \*corresponding author, email address: [maja.brus@slu.se](mailto:maja.brus@slu.se)

11

12

13

14

15

16

17

18

19

20

21

22

23

## 24 **Summary**

25 Transglutaminases (TGases) are enzymes highly conserved among prokaryotic and  
26 eukaryotic organisms, where their role is to catalyse protein cross-linking. One of the  
27 putative TGases of *Phytophthora infestans* has previously been shown to be localised  
28 to the cell wall. Based on sequence similarity we were able to identify six more genes  
29 annotated as putative TGases and show that these seven genes group together in phy-  
30 logenetic analysis. All of the seven proteins are predicted to contain transmembrane  
31 helices and both a TGase domain and a MANSC domain, the latter of which was pre-  
32 viously shown to play a role in protein stability. Chemical inhibition of transglutami-  
33 nase activity and silencing of the entire family of the putative cell wall TGases are  
34 both lethal to *P. infestans* indicating the importance of these proteins in cell wall for-  
35 mation and stability. The intermediate phenotype obtained with lower drug concen-  
36 trations and less efficient silencing displays a number of deformations to germ tubes  
37 and appressoria. Both chemically treated and silenced lines show lower pathogenicity  
38 than the wild type in leaf infection assays. Finally, we show that appressoria of *P. in-*  
39 *festans* possess the ability to build up turgor pressure and that this ability is decreased  
40 by chemical inhibition of TGases.

41

42 *Keywords:* potato late blight, transglutaminase, RNAi, silencing, chemical inhibition,  
43 phenotype, cell wall, oomycete biology

## 44 **Introduction**

45 Transglutaminases (TGases) are a group of enzymes (EC 2.3.2.13) that catalyse acyl transfer  
46 between  $\gamma$ -carboxamide groups of peptide-bound glutamine and a wide variety of acceptor sub-  
47 strates, usually primary amino acids (Folk, 1980). Of most interest and hence the best studied  
48 reaction catalysed by TGases is the interaction with  $\epsilon$ -amino groups of peptide-bound lysine  
49 residues resulting in inter- or intramolecular protein cross-linking ( $\epsilon$ -( $\gamma$ -glutamyl) lysine cross-  
50 link) (Folk, 1980, Lorand and Graham, 2003). Although first discovered and extracted from  
51 animal tissue (Sarkar et al., 1957, Folk and Cole, 1966), TGases are widely conserved among  
52 both prokaryotic and eukaryotic organisms (Martins et al., 2014, Icekson and Apelbaum, 1987).  
53 The conservation of enzymatic properties in different organisms has therefore allowed for re-  
54 placement of the previously used guinea pig TGase by the cheaper and ethically preferable  
55 microbial transglutaminase (MTG) in food manufacturing (Martins et al., 2014, Kieliszek and  
56 Misiewicz, 2014). The biological roles of transglutaminases are still best characterised for  
57 humans, where all nine TGases have been assigned to different organs and a specific function  
58 has been assigned to eight of them (Eckert et al., 2014). The microbial TGases identified to  
59 date do not share a significant sequence similarity to any of the other characterised TGase  
60 classes. Their biological functions remain largely unknown and they are essentially unstudied  
61 beyond their early identification (Makarova et al., 1999, Giordano and Facchiano, 2019). An  
62 *in silico* study by Makrova et al. (1999) identified a class of microbial proteins, with only one  
63 characterised member – a single protease, that shares a significant sequence similarity with  
64 animal TGases. They thus propose proteases as a common ancestor of all transglutaminases.  
65 Interestingly, although plant TGases do not show high sequence similarity to those from ani-  
66 mals, they do resemble them structurally and can interact with animal TGase antibodies  
67 (Beninati et al., 2013). The main functions of plant TGases are usually linked to photosynthesis,  
68 responses to stress, senescence and programmed cell death and it is believed they do so through

69 stabilisation and modification of various proteins involved in these processes (Zhong et al.,  
70 2019, Serafini-Fracassini and Del Duca, 2008).

71 The first oomycete TGase to be characterised was found thanks to its role in the induction of  
72 immune responses in plants. A 42kDa cell wall glycoprotein (GP42) of *Phytophthora sojae*,  
73 previously shown to contain thirteen amino acid peptide - Pep13 that acts as an elicitor of  
74 defence mechanisms in parsley (Nürnberg et al., 1994, Hahlbrock et al., 1995), was charac-  
75 terised as a Ca<sup>2+</sup>- dependent TGase and its homologs were found in all *Phytophthora* species,  
76 including *P. infestans* (Brunner et al., 2002). Although the GP42 protein showed enzymatic  
77 and biochemical similarities to human transglutaminases its folding patterns were shown to be  
78 novel and to not resemble any characterised proteins (Reiss et al., 2011).

79 We have previously shown that peptides from the putative TGase encoded by the *P. infestans*  
80 gene PITG\_22117 are found predominantly in the cell wall of germinated cysts and appressoria  
81 (Grenville-Briggs et al., 2010) and that the gene is highly expressed in cysts, appressoria and  
82 during the early stages of infection of potato plants (Grenville-Briggs et al., 2010, Resjö et al.,  
83 2017). These results suggest a role for TGases in the development of infectious structures and  
84 hence the pathogenicity of *P. infestans*. To test this hypothesis, in the current study we have  
85 performed an *in silico* analysis of the family of putative TGases with the highest sequence  
86 similarity to PITG\_22117. We have identified six additional genes and transiently silenced all  
87 seven of them to screen for possible developmental changes due to the lack of expression of  
88 putative TGases. Silencing resulted in structural changes in appressorium formation which cor-  
89 related with a reduction in pathogenicity. Similar phenotypes were observed upon treatment of  
90 cysts of *P. infestans* with the transglutaminase inhibitor cystamine.

91

## 92 **Results and Discussion**

93 *There are 21 putative transglutaminases identified in Phytophthora infestans*

94 In previous studies we have shown that at least one of the *P. infestans* transglutaminases is  
95 found in the cell wall of germinating cysts and appressoria (Grenville-Briggs et al., 2010). We  
96 have verified that the PITG\_22117 gene encoding this protein is highly expressed in cysts and  
97 appressoria and at early infection stages – 6 hpi and 12 hpi, when the appressoria are formed  
98 on the leaf surface and start to penetrate the host cells (Resjö et al., 2017). Here, we have used  
99 an *in silico* approach to look for other TGases using sequence similarity searches. A BLASTn  
100 search yielded five additional genes, two of which belong to the M81 gene family:  
101 PITG\_16956, PITG\_16958, PITG\_16959 (M81D), PITG\_16963 (M81C), PITG\_22104; and  
102 one gene labelled just as M81E. The M81 gene family was characterised as a family of elicitor-  
103 like proteins with divergent structures (Fabritius and Judelson, 2003). We also used string  
104 searches, such as “*Phytophthora infestans* transglutaminase” using the NCBI non-redundant  
105 (nr) Gene database and found 21 results with varying degrees of annotation. We have retrieved  
106 protein sequences of all of these 21 genes and constructed a maximum likelihood phylogenetic  
107 tree (Figure 1). The phylogenetic analysis of the protein sequences confirmed that proteins en-  
108 coded by the genes found by BLASTn group together. From the phylogenetic analysis we have  
109 also identified two additional genes of high sequence similarity PITG\_16953 and PITG\_08335.  
110 Moreover, with the exception of PITG\_22104, which is a short sequence with 100% similarity  
111 to PITG\_16959 and thus a possible pseudogene, all of the six genes with high similarity to  
112 PITG\_22117 include the conserved sequence encoding the Pep13 peptide, an elicitor of plant  
113 defence responses (Nürnberger et al., 1994, Brunner et al., 2002). The PITG\_22104 gene was  
114 excluded from further analysis. These findings are to some extent consistent with the study  
115 showing the M81 gene family to encode elicitors of which several are transglutaminases con-  
116 taining Pep13 (Fabritius and Judelson, 2003). While the M81 protein was reported to be mating

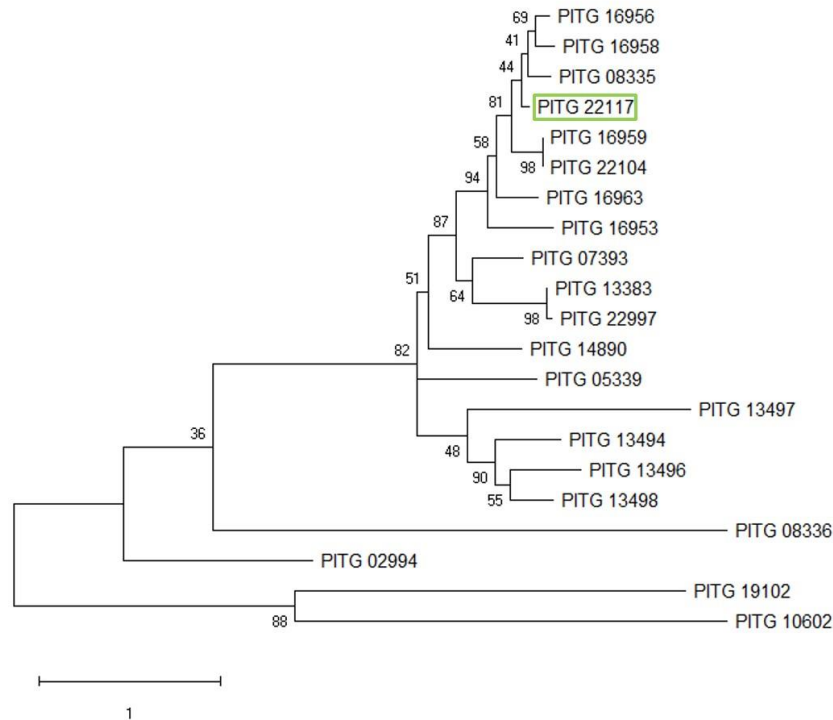

117

118 **Figure 1. Maximum likelihood phylogenetic tree of *P. infestans* TGase proteins.** Bootstrap, 1000 replicates.  
119 The scale bar represents number of substitutions per site.

120

121 specific, other members of the family are expressed at different life cycle stages. A more recent  
122 study from the same group reports PITG\_13497 as induced over 100-fold during mating, where  
123 it is believed to play an important role in the synthesis of the very thick oospore cell wall (Niu  
124 et al., 2018).

### 125 *All Pep13 TGases are transmembrane elicitor proteins*

126 The seven TGases containing the Pep13 peptide were functionally annotated *in silico*. The  
127 presence of a TGase elicitor domain (IPR032048) was predicted in all of them. Additionally,  
128 in all seven proteins the TGase domain overlapped largely with a MANSC – Motif At N ter-  
129 minus with Seven Cysteines domain (PTHR16021; Figure 2). All animal proteins containing  
130 the MANSC domain that have been reported so far contain both signal peptide and transmem-  
131 brane helix regions, and the seven cysteines are suggested to form disulphide bonds that play

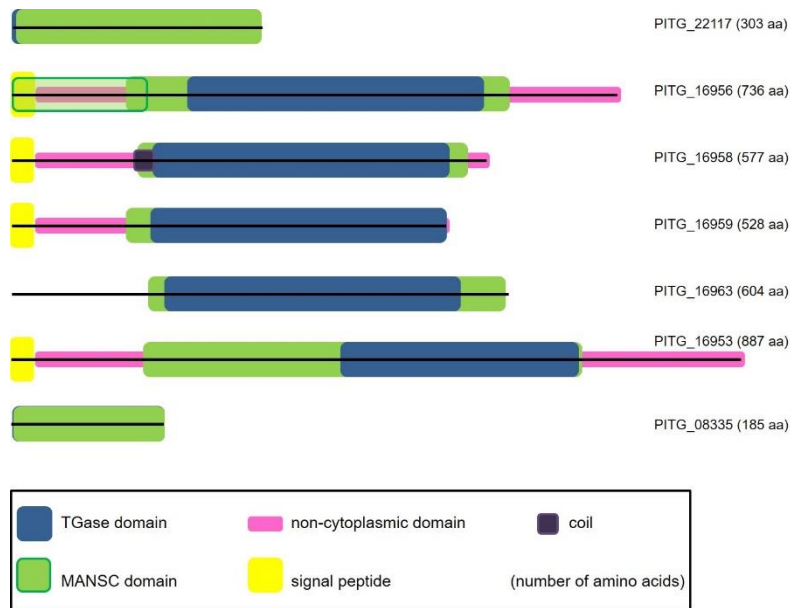

132

133 **Figure 2. Functional domains in elicitor-TGases.** The sequences are aligned at amino acid 1, to show the dif-  
134 ference in length. Functional domains predicted by InterProScan are represented by blocks of different colours  
135 and drawn to scale (see legend at the bottom of the figure).

136

137 a role in protein structure and stability (Guo et al., 2004). The presence of transmembrane  
138 helices was predicted by the use of transmembrane topology prediction software in proteins  
139 encoded by genes PITG\_16956, PITG\_16958, PITG\_16959 and PITG\_16953. All these pro-  
140 teins were also predicted to contain signal peptides at their N-termini. The lack of transmem-  
141 brane helix or signal peptide prediction for the remaining proteins suggests that they may be  
142 entirely embedded in the cell wall, or that they may be cytoplasmic, or localised via non-clas-  
143 sical secretion pathways. In the two shortest *P. infestans* proteins – PITG\_22117 and  
144 PITG\_08335 the TGase and MANSC domains cover the entire length of their sequences.  
145 PITG\_16963 contains a stretch of 185 amino acids at its N-terminus for which there were no  
146 domains predicted, while the entire length of the remaining four proteins is predicted as a non-  
147 cytoplasmic domain (Figure 2), suggesting they may be localised to the cell wall via non-clas-  
148 sical secretion. These predictions show that all seven members of this family are likely to be  
149 transmembrane proteins with putative TGase elicitor functions.

150 *The elicitor-TGases are highly expressed at early infection time points*

151 The expression of all seven elicitor-TGase genes was compared in the asexual pre-infection  
152 stages (produced *in vitro*) and early infection time points (detached leaf assays) sampled at  
153 6 hpi, 12 hpi and 24 hpi (Figure 3). Expression of PITG\_16958 was undetectable in either *in*  
154 *vitro* or infection assays, which suggests that it might be expressed specifically in the sexual  
155 reproduction cycle, or at only very low levels. A recent study of *P. infestans* sexual reproduc-  
156 tion revealed that gene expression could be strain-dependent and the level of expression in the  
157 oospores can vary for different strain combinations, with PITG\_16958 highly upregulated in  
158 some of the oospores and downregulated in others (Tzelepis et al., 2020; and personal  
159 communication with the authors). These data also suggests that perhaps the PITG\_16958 gene  
160 is not expressed in the 88069 strain that we used in the current study.

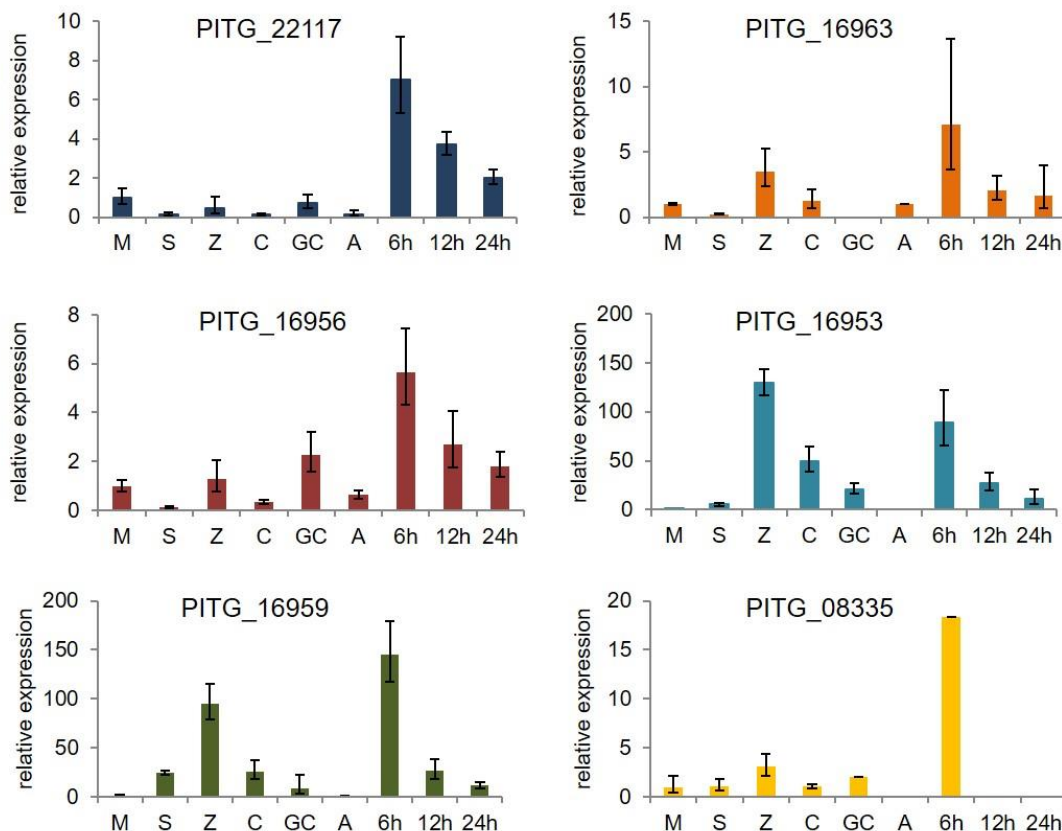

161

162 **Figure 3. Expression profiles of the elicitor-TGases.** The expression was calculated relative to ActA and cali-  
163 brated to mycelium sample for which the expression was set to 1. M - mycelium, S - sporangia, Z - zoospores,  
164 C - cysts, GC - germinated cysts, A - appressoria, 6h, 12h, 24h - hours post inoculation with cyst solution. Gene  
165 PITG\_16958 is not shown as there was no signal detected for this gene. Error bars represent errors calculated using  
166 the modified Delta-Delta Ct method.



167 All of the other six genes showed the highest expression at 6 hpi on detached potato leaves, i.e.  
168 at the time point when the majority of appressoria are being formed on the leaf surface; and at  
169 12 hpi when first penetration of the host cells occurs. PITG\_16953 was the only gene in which  
170 the expression was the highest in the zoospores. The much higher level of gene expression at  
171 6 hpi than in pre-infection stages in the other genes indicates that the expression of the genes  
172 is not only life cycle specific, but also induced by the presence of the host. PITG\_22117 was  
173 the only gene in which no significant differences were found between the different pre-infec-  
174 tion life cycle stages and the expression was induced only by the infection. Genes PITG\_16959,  
175 PITG\_16963 and PITG\_16953 are most likely zoospore specific, since their expression was  
176 significantly higher at this stage than in any other part of the life-cycle tested. PITG\_08335  
177 exhibited higher expression in the zoospores, but the induction was only slight and much lower  
178 than in the other three genes (Figure 3). What is more, there was no signal read for this gene in  
179 appressoria, or at 12 hpi and 24 hpi indicating an absolute lack of expression during these stages  
180 (verified in three independent biological replicates). Since zoospores lack a cell wall and it is  
181 at the transition between the zoospore and cyst when the cell wall needs to be quickly formed  
182 *de novo* (Grenville-Briggs et al., 2008), the high level of gene expression points toward a role  
183 for these genes in cyst cell wall formation and possibly in the development of the (pre)infec-  
184 tious structures. PITG\_16956 showed a more specific expression pattern being highly induced  
185 in the germinated cysts when the appressoria are formed. Nonetheless, the level of induction is  
186 generally much lower in this gene than in the zoospore specific ones (Figure 3). Therefore, we  
187 hypothesise that much higher levels of transglutaminases are necessary for the encystment and  
188 germination of cysts than for the formation of appressoria and thus several TGases are very  
189 highly expressed in the zoospores, whilst a lower induction is sufficient for the formation of  
190 appressoria.

191

192 *Chemical inhibition of TGases affects the growth and germination of P. infestans*

193 Cystamine was previously reported to inhibit the activity of TGases in humans (Lorand and  
194 Graham, 2003, Jeitner et al., 2018) and fungi (Ruiz-Herrera et al., 1995, Iranzo et al., 2002).  
195 Cystamine treatment of fungi resulted in growth inhibition, morphological changes, influenced  
196 incorporation of peptides into the cell wall and inhibited the yeast-to-mycelium transition in  
197 dimorphic fungi (Reyna-Beltrán et al., 2019). However, the effects of cystamine on oomycete  
198 growth or development have not been tested before. We grew *P. infestans* in both liquid and  
199 solid media at a range of cystamine concentrations and were able to show that independent of  
200 the type of medium, 5 mM cystamine inhibits mycelial growth by about 40 %, 7.5 mM by 60%,  
201 10 mM by 90 % and at 20 mM and higher concentrations there was no growth observed at all.  
202 Sporangial germination was also affected by the chemical treatment; 7.5 mM cystamine inhib-  
203 ited germination completely, while at 5 mM cystamine there were only single germ tubes  
204 found. The germ tubes at 2.5 mM and 1 mM cystamine had more deformations than the ones  
205 seen at lower concentrations (Figure 4).

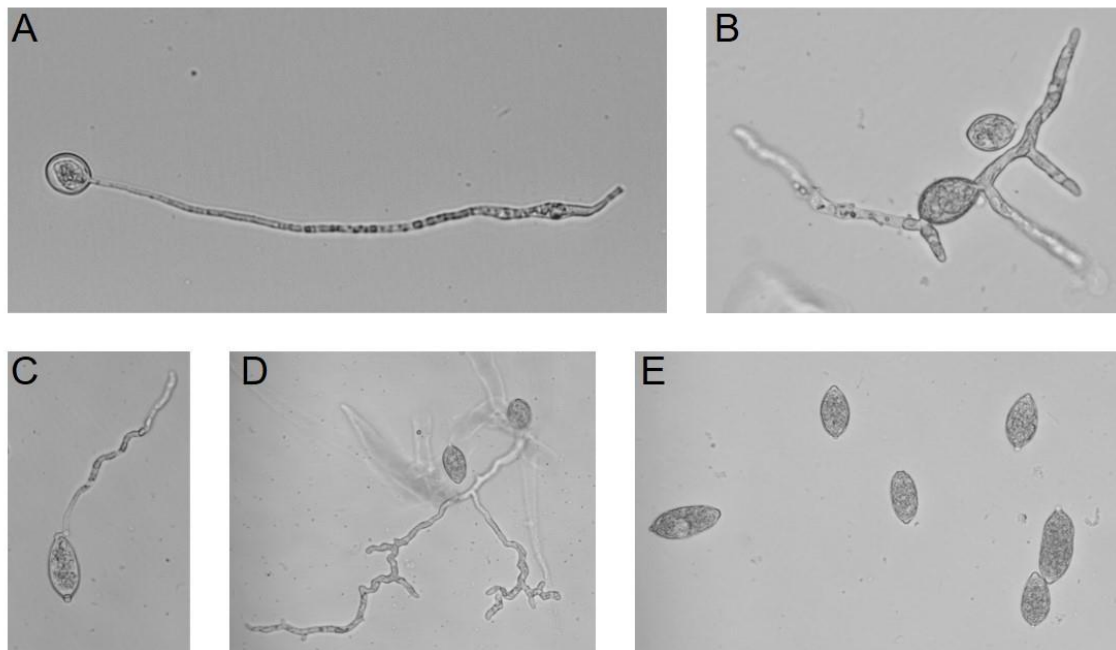

206

207 **Figure 4. Effect of cystamine on sporangia germination. A:** untreated sample, **B:** 1 mM cystamine, **C:** 2.5 mM  
208 cystamine, **D:** 5 mM cystamine, **E:** 7.5 mM cystamine. Panel **A** shows a healthy germinating sporangium. Addi-  
209 tion of cystamine to the growth medium resulted in deformations of the germ tubes (**B, C, D**), lower percentage  
210 of germination (**D**) and at 7.5 mM (**E**) complete inhibition of germination.

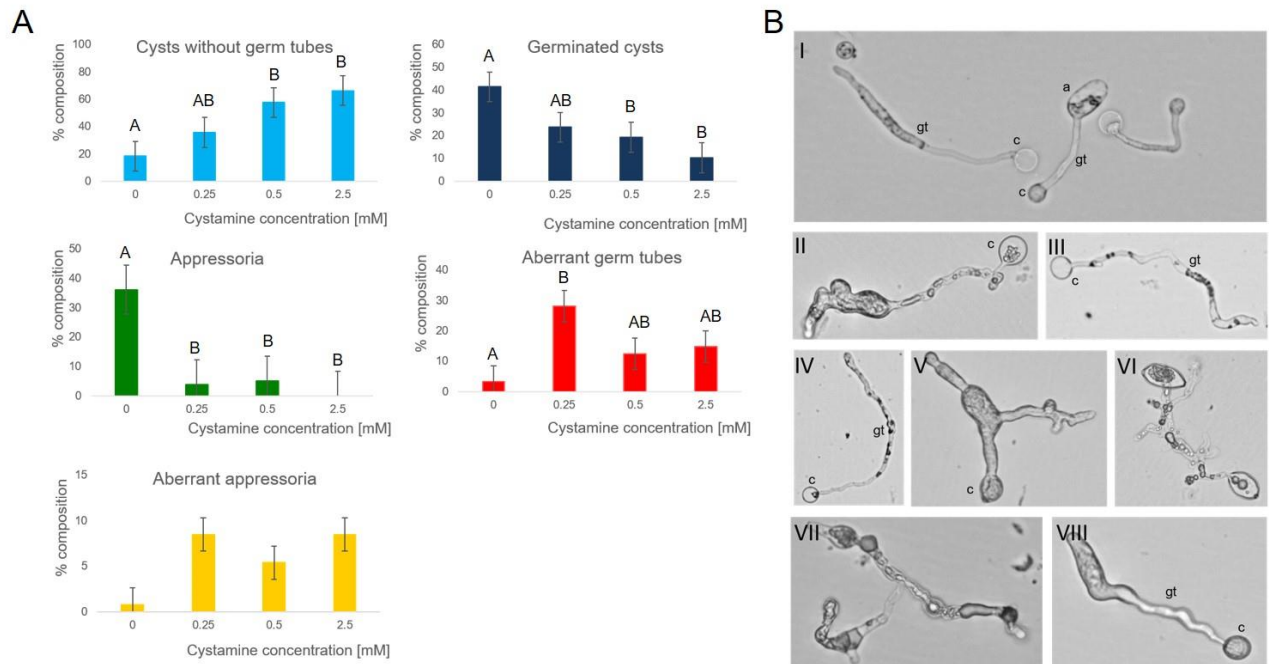

211

212 **Figure 5. Effect of cystamine treatment on cyst germination and formation of appressoria.** **A:** The percent-  
 213 age of cysts, germinated cysts, appressoria, aberrant germ tubes and aberrant appressoria was calculated for sam-  
 214 ples treated with different concentrations of cystamine. The error bars represent standard error and the letters  
 215 represent significance of the difference of means (ANOVA followed by Fisher LSD test). **B:** Inverted light mi-  
 216 croscope images of cysts treated with different concentrations of cystamine and allowed to form appressoria. **I:**  
 217 wild type, untreated cysts (c) with healthy germ tubes (gt) and appressoria (a); **II:** cysts treated with 0.25 mM  
 218 cystamine, about 50% germ tubes showed swelling and other deformations; **III and IV:** 0.5 mM cystamine, a  
 219 large number of cysts germinated, but most of the germ tubes were deformed or collapsed; **V and VI:** 1 mM  
 220 cystamine, severe deformations to germ tubes, in some cases making it difficult to discern particular structures;  
 221 **VII and VIII:** 2.5 mM cystamine, severe deformations like in 1 mM cystamine, very few appressoria and the  
 222 ones that formed were collapsed.

223

224 To test the effect of cystamine on zoospore release, solid cultures were flooded with cystamine  
 225 solutions of concentrations ranging between 0.5 and 200 mM. None of the concentrations had  
 226 any effect on the release or motility of the zoospores. However, cysts produced from cystamine  
 227 treated zoospores had a lower germination rate than untreated ones (Figure 5). At 0.5 mM the  
 228 germination rate was about 50 % lower, while at 2.5 mM it decreased by 75 %. Interestingly,  
 229 there were no differences in the rate of germination observed between 2.5 mM, 5 mM, 7.5 mM  
 230 and 10 mM (Figure 5A). This suggests that germination may be only partially dependent on  
 231 TGases, or that not all *P. infestans* TGases are sensitive to this inhibitor. Since most of the  
 232 TGases appear to be cell wall localised, the hypothesis that the ones without the signal peptide

233 are entirely embedded in the cell wall structure may somewhat explain the latter hypothesis, as  
234 they may not be accessible to the drug due to their location. An alternative might be that they  
235 are able to form complexes that protect their active sites from inhibition by this drug.  
236 The number of appressoria formed was reduced significantly from about 35 % of all structures  
237 in untreated samples to about 5 % in those treated with 0.25 mM and 0.5 mM cystamine. Ap-  
238 pressoria formation was severely inhibited by 2.5 mM cystamine (Figure 5A), and the few ap-  
239 pressoria that were produced were severely deformed, collapsed or burst (Figure 5B). Cysts  
240 treated with cystamine at concentrations higher than 1 mM lost pathogenicity and there were  
241 no lesions observed at the site of inoculation on potato leaves under these conditions (Figure  
242 6A and B). Cysts treated with 1 mM and 0.5 mM cystamine produced smaller lesions than the  
243 control ones (seen particularly well in Figure 6B) and there was no mycelial growth on the  
244 surface of the leaf at the site of inoculation (Figure 6A and B). We verified that the cystamine  
245 itself did not have any visual effect on the leaflets and hence that the observed tissue damage  
246 was solely due to the pathogen infection. Expression of all six TGase genes was lower in the  
247 cystamine treated samples than in the untreated control. The differences in gene expression  
248 were not significant between the 0.5 mM and 1.0 mM cystamine treatments (Figure 6C).  
249 Finally, we have also tested the effect of cystamine on protoplast recovery. In line with previous  
250 findings in the true fungi (Ruiz-Herrera et al., 1995), treatment with cystamine delayed the  
251 recovery of protoplasts. The first emergence of germ tubes was observed after about 36 hours  
252 in samples treated with cystamine, whereas in the wild type protoplasts recovery and germina-  
253 tion was observed much earlier at about 24 hours (data not shown). This effect was observed  
254 in samples treated with 5 mM and 2.5 mM cystamine, but not in lower concentrations of the  
255 drug, which corresponds well with the reduction of germination rate and increase in structural  
256 abnormalities in sporangia and cysts treated with cystamine.

257

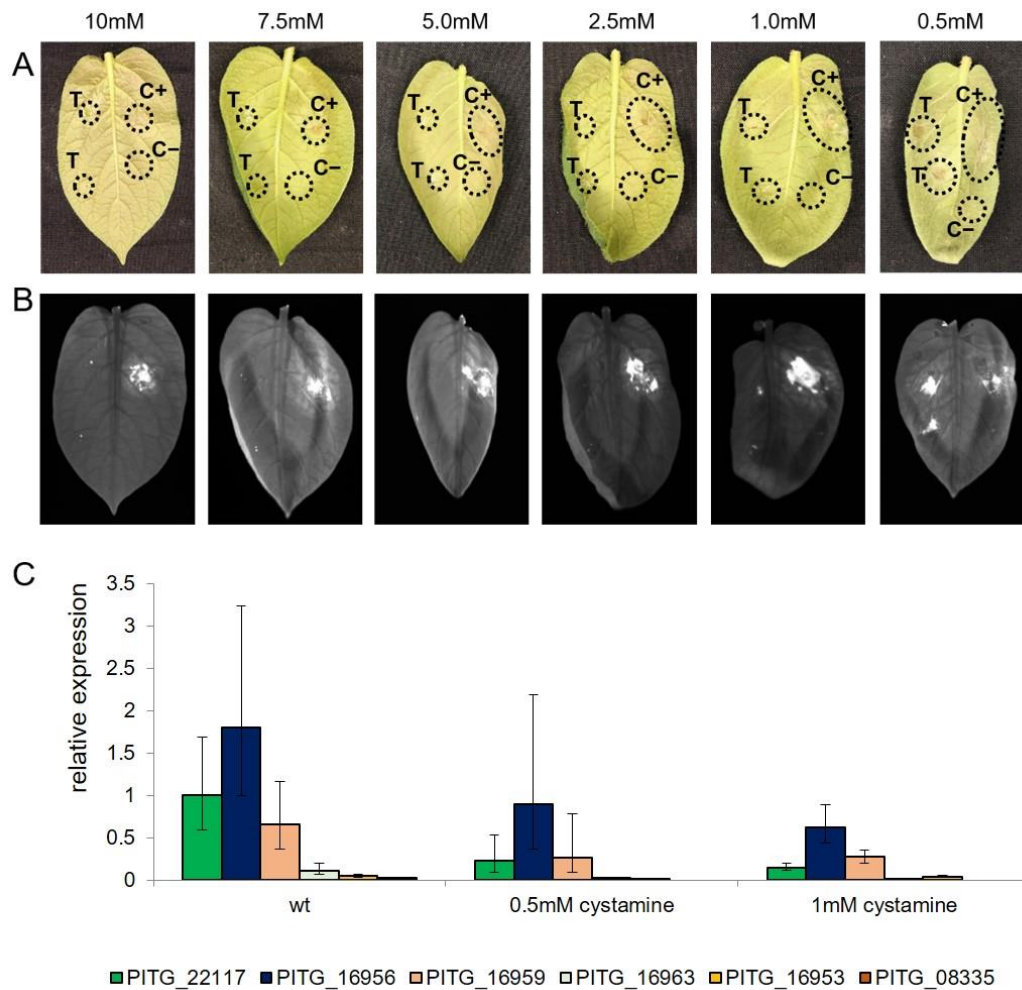

258

259 **Figure 6. Chemical inhibition of TGases.** **A:** Detached leaf assay (DLA). Potato leaflets were inoculated with  
 260 two drops of cyst solution treated with cystamine of different concentrations (indicated above the pictures) on the  
 261 left side of the leaf (T), with a control cysts solution in water on the top of the right leaf side (C+) and just  
 262 cystamine on the bottom right (C-). The same leaf was inoculated with the sample and both controls to screen for  
 263 possible adverse effects of leaf detachment. Pictures were taken at 3dpi. **B:** DLA leaves scanned on ChemiDoc  
 264 MP Imager with Cy7 filter (transmission between 755 and 777 nm). Exposure time 5 seconds. The damaged areas  
 265 of the leaflet appear bright in the image. **C:** Expression of elicitor TGases after treatment with cystamine. Expres-  
 266 sion of the six putative TGases was tested in samples collected 6 hpi with *P. infestans* cysts treated with cystamine.  
 267 The expression of the gene was analysed by qRT-PCR with *ActA* as the reference gene and the wt PITG\_22117  
 268 sample as the calibrator sample set to 1. Error bars represent errors calculated using the modified Delta-Delta Ct  
 269 method.

270

### 271 *P. infestans* mycelial extracts exhibit transglutaminase enzymatic activity

272 Despite sequence and structural differences between the *P. infestans* and human transglutami-  
 273 nases we were able to demonstrate transglutaminase enzymatic activity in crude extracts of  
 274 *P. infestans* mycelial cultures when tested with a kit designed for human transglutaminases  
 275 (Abcam Transglutaminase Activity Kit). The enzymatic activity in our samples was lower than  
 276 would be expected for human tissue samples, yet it was significantly above the detection levels

277 of the kit and at a level similar to the positive control supplied with the kit (Supplementary  
278 Figure 1). No significant differences were detected between the cystamine treated (10 mM)  
279 and the control samples, supporting the hypothesis that cystamine has only a limited effect on  
280 the overall transglutaminase activity of a cell or that it only affects some and not all of the  
281 transglutaminases present in the organism.

282

### 283 *Inhibition of TGases reduces turgor pressure of appressoria*

284 Appressoria are structures produced specifically to build pressure and to provide a focal point  
285 for the secretion of digestive enzymes to penetrate host cells. To break the barrier of the plant  
286 cell wall appressoria must possess a thick cell wall and produce significant turgor pressure, i.e.  
287 the pressure resulting from plasma membrane being pushed against cell wall (Wang et al.,  
288 2005, Meng et al., 2009). Since we had observed appressoria bursting and cell collapse when  
289 *P. infestans* was treated with cystamine *in vitro*, we decided to measure the difference in turgor  
290 pressure produced in treated and untreated appressoria, using an incipient plasmolysis cell-  
291 collapse assay. The untreated healthy appressoria exhibited an average turgor pressure of  
292 3.325 MPa, while in appressoria produced in the presence of cystamine the turgor pressure was  
293 estimated to be 1.327 MPa at 0.25 mM cystamine and 1.282 MPa at 0.50 mM cystamine (Fig-  
294 ure 7). This is compared to turgor pressure in the hyphae, which previous studies have esti-  
295 mated to be 0.6-0.8 MPa in fungi and 0.8-1.2 MPa in oomycetes (Brand, 2012, Money, 1990).  
296 This significant decrease in turgor pressure of cystamine treated appressoria is in line with our  
297 finding that at this concentration pathogenicity of the cysts is largely reduced and clearly  
298 demonstrates that an increase in turgor pressure in appressoria is required for infection.

299

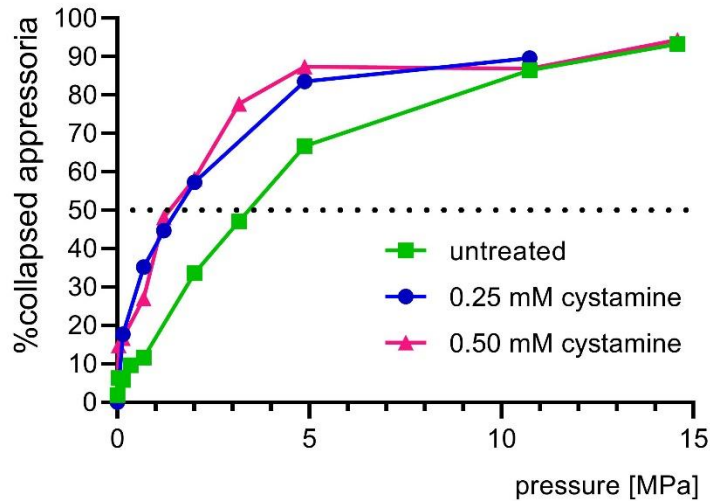

300

301 **Figure 7. Effect of cystamine treatment on turgor pressure of appressoria.** Appressoria were incubated in  
302 different concentrations of PEG8000, thus subjected to osmotic pressure ranging from 0 to 15MPa. The turgor  
303 pressure of the cell is estimated to be the equal to the pressure at which 50% of appressoria collapse (incipient  
304 plasmolysis).

305

306 *RNAi-based transient silencing of TGases can be lethal*

307 To confirm the importance of the elicitor-TGases for the viability and development of cysts  
308 and appressoria in *P. infestans* we silenced the TGase elicitor genes transiently using  
309 RNAi-based protocol. We designed primers to amplify dsRNA molecules that recognise seven  
310 of the investigated genes (due to sequence similarity the PITG\_16958 gene that showed lack  
311 of expression was also targeted). These genes exhibit such high sequence similarity that it was  
312 not possible to target them individually with RNAi. Silencing of the entire family of TGases  
313 proved lethal and we could not recover the silenced lines. The few lines for which we were  
314 able to recover tiny pieces of mycelia grew slowly on a solid medium and the cysts produced  
315 from them burst during incubation in water. Given that the high level of sequence conservation  
316 prohibits silencing of individual genes, we re-designed the reverse primer to lower its specific-  
317 ity, in an attempt to achieve less-efficient gene silencing. The new reverse primer matched

318 genes PITG\_22117 and PITG\_16956 100%, but not the other ones. This lower primer speci-  
319 ficity allowed us to recover lines with intermediate phenotypes and varying expression levels  
320 of the targeted transglutaminase genes (Table 1 and Supplementary Figure 2). The most severe  
321 phenotype seen was still lethal with either all of the structures burst or bursting at the time of  
322 phenotype assessment (Figure 8B: VI and VII). Several lines displayed phenotypes similar to  
323 the control lines with almost all cysts germinating and about 40-50 % of them producing ap-  
324 pressoria with few abnormal structures (Figure 8A; lines 2, 9, 12, 15 and 17). The majority of  
325 intermediate phenotypes displayed more structural abnormalities than the control lines (Figure  
326 8A; lines 1, 3-8, 13, 14, 16), mostly swelling of the germ tubes (Figure 8B: II and III), but also  
327 twisted and very long germ tubes or multiple germ tubes originating from the same cyst (Figure  
328 8B: II). We have also seen structures we previously referred to as “apressoria like” (Grenville-  
329 Briggs et al., 2008) – a bulging of the germ tube in an attempt to form an apressorium that  
330 fails and the germ tube growth continues (Figure 8B: III-V). Finally, in some of the intermedi-  
331 ate phenotypes while there were not many abnormalities observed there were fewer apressoria  
332 produced compared to the non-endogenous control lines (Figure 8A; lines 10 and 11). These  
333 phenotypes were similar to, and consistent with, those seen by cystamine treatment and de-  
334 scribed above. All RNAi lines that displayed phenotypic differences compared to the control  
335 lines had an overall lower level of transglutaminase gene expression (Table 1 and Supplemen-  
336 tary Figure 2). We investigated two lines with higher number of abnormal structures, lines 3  
337 and 7, two lines in which there were less apressoria produced but not many abnormalities,  
338 lines 10 and 11, and two lines with a wild type phenotype, lines 9 and 12. As predicted from  
339 the expression profiles in life cycle stages and infection time points (Figure 3) the PITG\_16958  
340 gene was not expressed in any of the samples. In line 3 all the remaining six genes were ex-  
341 pressed at lower level compared to the control and in line 7 four genes showed lower expression  
342 and two showed expression levels similar to, or higher than, the control lines (Table 1 and



343 Supplementary Figure 2). In the lines with fewer appressoria, lines 10 and 11, the overall ex-  
 344 pression was also lower than in the control sample, with only one gene in line 11 and two in  
 345 line 10 showing similar or slightly higher expression levels than the controls (Table 1 and Sup-  
 346 plementary Figure 2). In the two lines that did not display phenotypic differences the overall  
 347 expression of transglutaminases was higher than in the other RNAi lines, with three genes  
 348 showing expression similar to, or higher than control levels, and three genes showing reduced  
 349 expression in line 9; while in line 12 five out of six genes were expressed at control levels or  
 350 higher (Table 1 and Supplementary Figure 2).

351

352 **Table 1. Relative expression of transglutaminase genes in RNAi lines.** The presented values are expression  
 353 relative to the expression of the reference *Actin A* gene and calibrated to the expression of the specific gene in  
 354 the GFP control sample, which was set to 1. Values above 1 (pink) indicate higher and below 1 (purple) lower  
 355 expression than the expression of the given gene in the control sample. \* indicates lack of detected signal, i.e.  
 356 the expression is below the detection level. Pathogenicity data from DLA experiments are presented for compar-  
 357 ison.

| RNAi line | Gene number |            |            |            |            |            | Pathogenicity |
|-----------|-------------|------------|------------|------------|------------|------------|---------------|
|           | PITG_22117  | PITG_16956 | PITG_08335 | PITG_16953 | PITG_16959 | PITG_16963 |               |
| <b>3</b>  | *           | *          | *          | *          | *          | *          | Lower         |
| <b>7</b>  | 1.945746    | 0.303926   | 0.507534   | 1.964669   | 0.301265   | 0.324826   | Lower         |
| <b>9</b>  | *           | 1.98087    | *          | 1.779605   | 2.041624   | *          | Yes           |
| <b>10</b> | 0.892556    | 0.33275    | 0.604045   | 1.668856   | 1.103508   | *          | Lower         |
| <b>11</b> | 1.057386    | 0.565048   | *          | 0.929691   | 0.698291   | 0.295875   | Lower         |
| <b>12</b> | 5.911655    | 2.406242   | 2.300192   | 0.970109   | 2.925382   | 1.577009   | Yes           |

358

359

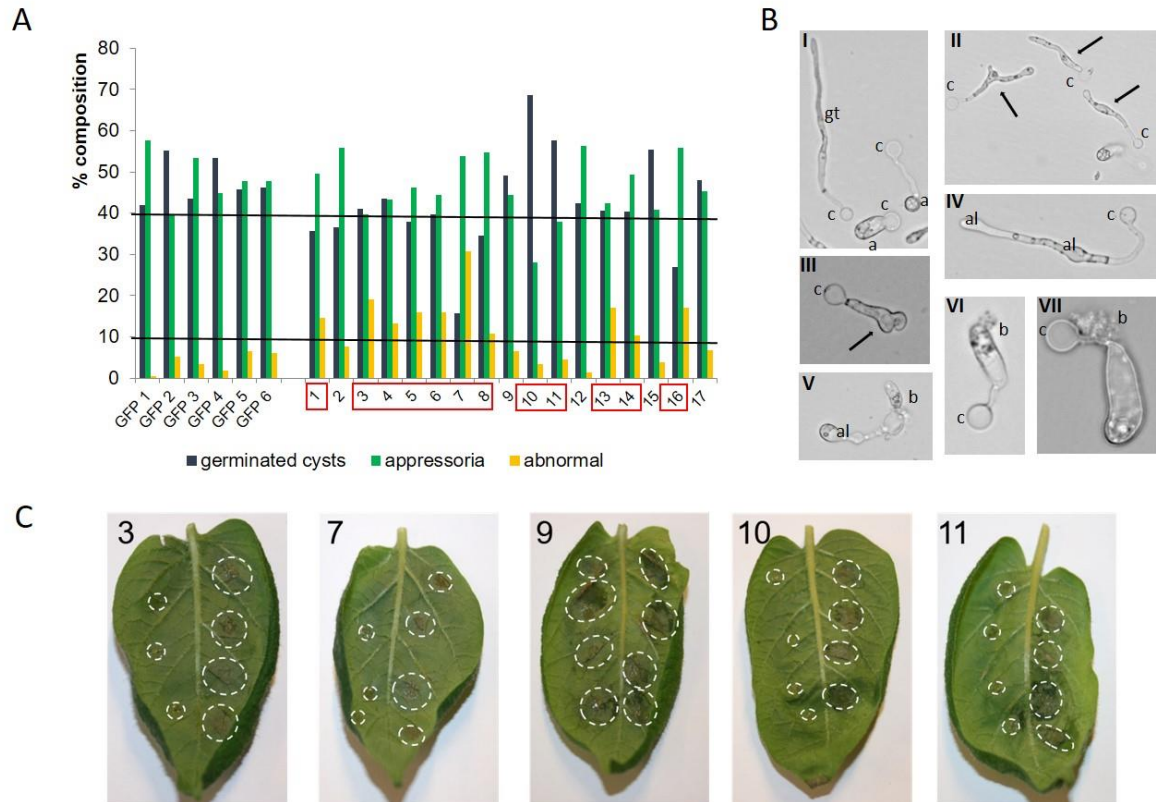

360

361 **Figure 8. RNAi-based transient silencing of elicitor-TGases. A:** Percentage of germinated cysts, appressoria  
 362 and abnormal structures counted in individual silenced lines and individual GFP controls. The lines marked in red  
 363 were less pathogenic than the control ones. The horizontal lines are arbitrary thresholds for the minimal number  
 364 of healthy appressoria (upper) and maximum number of abnormal structures (lower) for a line to be pathogenic.  
 365 **B:** Inverted light microscope images of the counted structures. I: GFP controls with healthy cysts (c), germ tubes  
 366 (gt) and appressoria (a); II and III: swelling and multiple germ tubes; IV and V: appressoria-like structures (al); V,  
 367 VI and VII: bursting of appressoria and cyst **C:** Detached leaf assay (DLA). Potato leaves were inoculated with  
 368 four drops of cyst solution from different RNAi lines on the left side and GFP control lines on the right side of  
 369 the main vein. The RNAi line is indicated in the top left corner of each picture. Pictures were taken at 4dpi.

370

371 To test the pathogenicity of the RNAi lines, cysts were collected from the same lines that were  
 372 used for phenotypic assessment. For detached leaf assays the same leaf was inoculated with  
 373 cysts from a single TGase RNAi line on the left side and from a single GFP non-endogenous  
 374 control line on the right side of the primary vein to account for the possible adverse effects of  
 375 the leaf detachment, or minor variations in individual leaves. The majority of the TGase RNAi  
 376 lines showed reduced or no pathogenicity when compared to the control lines, including lines  
 377 3, 7, 10 and 11 (Figure 8C) in which expression of transglutaminase genes was overall lower  
 378 than in the controls (Table 1 and Supplementary Figure 2). The pathogenicity of lines 12 and

379 19 was not affected, which corresponds well with the gene expression data (Table 1 and Sup-  
380 plementary Figure 2). Comparison of the phenotype, pathogenicity and gene expression data  
381 suggests that neither of the investigated TGases is essential for the development of cysts and  
382 appressoria on its own, but a certain expression level is necessary, i.e. the proteins are redun-  
383 dant to some extent. Nonetheless, decreased expression of the PITG\_16956 gene in all of our  
384 RNAi lines with decreased pathogenicity points towards the role of this particular gene in ap-  
385 pressoria development and is consistent with its high expression in germinated cysts (Figure  
386 3). The similarity of the phenotype observed in the silenced lines and the cysts treated with  
387 cystamine validates the hypothesis that whilst complete inhibition of TGase activity is lethal to  
388 *P. infestans*, the redundancy of the proteins allows for partial loss of function in any of them.

### 389 *Conclusions*

390 The presented data shows that transglutaminases are essential for the development of a healthy  
391 cell wall and thus growth, development and pathogenicity of *P. infestans*. The chemical inhi-  
392 bition and RNAi silencing assays proved that targeting of these TGases could be used as an  
393 efficient control method. Targeting transglutaminase function to control late blight disease may  
394 offer a highly specific and potentially durable method of disease control. However, to succeed,  
395 all of the transglutaminase genes would need to be targeted simultaneously to avoid the poten-  
396 tial risk of *P. infestans* overcoming such a pesticide by adaptation of one of these partially  
397 redundant genes. Our data also show RNAi-based silencing to be a powerful method for the  
398 evaluation of potentially essential genes for which stable transformation and full silencing  
399 would prove lethal. Finally, for the first time we have shown that *P. infestans* appressoria build  
400 up turgor pressure, which although not at the level of that seen in fungal phytopathogens, ap-  
401 pears nevertheless to be essential to the infection process.

402

## 403 **Experimental Procedures**

### 404 *In silico analysis and phylogenetics*

405 The DNA sequence of *Phytophthora infestans* gene PITG\_22117 was used to search for similar  
406 sequences in *P. infestans* using BLASTn. Alignment of the sequences was performed using  
407 Clustal Omega (Madeira et al., 2019). To identify all proteins predicted to have TGase function  
408 string search “*Phytophthora infestans* transglutaminase” was used to search the NCBI Gene  
409 database. For all 21 results the protein sequences were retrieved from the database and used to  
410 construct a maximum likelihood phylogenetic tree (bootstrap method, 1000 replications) using  
411 MEGA-X software (Kumar et al., 2018). The functional domain and signal peptide predictions  
412 were performed using InterProScan (Jones et al., 2014).

### 413 *Phytophthora infestans cultivation*

414 All experiments were carried out using *P. infestans* strain 88069. For maintenance, cultures  
415 were grown on solid rye sucrose medium (Caten and Jinks, 1968), at 18 °C in darkness and  
416 sub-cultured every two to three weeks. Liquid cultures for extraction of RNA and growth inhi-  
417 bition assays were grown in pea broth, pH 7.25, at 18 °C in darkness.

### 418 *Transglutaminase expression throughout P. infestans life cycles and infection time course*

419 To analyse the expression profiles of all the investigated transglutaminases, 14-day old cultures  
420 were grown on rye sucrose and sporangia, zoospores, cysts, germinated cysts and appressoria  
421 were collected as described previously (Grenville-Briggs et al., 2010, Resjö et al., 2017). The  
422 samples were collected from pooled material originating from 20 individual cultures. The col-  
423 lected cysts were used to inoculate potato leaves (cultivar Désirée) in a detached leaf assay and  
424 infection time point samples were collected at: 6 hpi, 12 hpi and 24 hpi. Mycelium samples  
425 were grown in liquid pea medium for 48 h before collection. Each of the samples was ground  
426 in liquid nitrogen and the total genomic RNA was extracted using the Qiagen RNeasy Plant

427 Mini kit following the manufacturer's protocol. The samples were DNase treated (Turbo DNA-  
 428 free Kit, Invitrogen) before first strand cDNA synthesis was performed as described  
 429 (SuperScript III, Invitrogen; Grenville-Briggs et al., 2010). All cDNA samples were diluted to  
 430 5 ng  $\mu\text{l}^{-1}$  and the infection samples to 20 ng  $\mu\text{l}^{-1}$  before gene expression analysis by qRT-PCR.  
 431 The qRT-PCR was performed in a BioRad real-time PCR cyclers, using SYBR green as the  
 432 fluorescent dye and the primer pairs listed in Table 2. The expression of transglutaminase genes  
 433 was normalised to a reference gene *Actin A* and mycelium was used as a calibrator sample with  
 434 expression set to 1, the relative expression was calculated using modified Delta-Delta Ct  
 435 method, as described previously (Avrova et al., 2003).

436 **Table 2.** Primer pair sequences used for qRT-PCR and dsRNA synthesis. The underlined fragments of the  
 437 dsRNA synthesis primers are the T7 promoter sequences.

| <b>GENE</b> | <b>Primer sequences</b>                                                                                                                                              |
|-------------|----------------------------------------------------------------------------------------------------------------------------------------------------------------------|
| PITG_22117  | F: CAAGGTCTCGACTGTGTTCA<br>R: CATCAGCGACAAATGAATGC                                                                                                                   |
| PITG_16956  | F: ACGATCTCCAAATCGTCACC<br>R: CGTAGTCAAGTTGGCAAGCA                                                                                                                   |
| PITG_16958  | F: CGGAGCCTGTCTTCTCAAAG<br>R: AGTCCTTGGCGGACTTCTCT                                                                                                                   |
| PITG_16959  | F: GTTGGGATGACACGGCTATC<br>R: GCGTGTGAACAGCCTGAGTA                                                                                                                   |
| PITG_16963  | F: CCTGCCTACTAAGGGTGTGC<br>R: AAATCCGTCACGTCAAGACC                                                                                                                   |
| PITG_16953  | F: GATGCGTACACGACGACAAC<br>R: TGTGGTAGACGTCGAAGTGG                                                                                                                   |
| PITG_08335  | F: CATGGACATCAAAGCTCTCG<br>R: AGGATTCATGTCGCGGTAAG                                                                                                                   |
| ActA        | F: CATCAAGGAGAAGCTGACGTACA<br>R: GACGACTCGGCGGCAG                                                                                                                    |
| 22117_T7    | F: <u>GTAATACGACTCACTATAGGGG</u> TGCGAGGGTTCAAGGTGTA<br>R: <u>GTAATACGACTCACTATAGGGG</u> GAAGATCCACGAGAGACG<br>R2: <u>GTAATACGACTCACTATAGGGG</u> GTCGTGTAGCGATCAACCT |
| GFP_T7      | F: <u>GTAATACGACTCACTATAGGGG</u> CAGATTGCGTGGACAGGT<br>R: <u>GTAATACGACTCACTATAGGGG</u> CTGGAGTACAACCTACAACCT                                                        |

438

439

440 *RNA interference*

441 Oligonucleotide primers with T7 polymerase RNA promoters (Table 2) were designed to am-  
442 plify a 200 bp long transglutaminase amplicon. Due to high sequence similarity, it was not  
443 possible to design unique primers for each of the transglutaminase genes; therefore, the de-  
444 signed primers were able to amplify fragments from seven similar transglutaminase genes:  
445 PITG\_22117, PITG\_16953, PITG\_16956, PITG\_16958, PITG\_16959, PITG\_16963 and  
446 PITG\_08335. Lack of binding elsewhere was confirmed by BLASTn search within *P. infestans*  
447 genome (performed with the low-complexity filter turned off). 1 µg of the PCR product was  
448 used to synthesise dsRNA with MEGAscript RNA interference kit (Ambion) according to man-  
449 ufacturer's protocol. GFP was used as a non-endogenous positive control to ensure that any  
450 possible phenotypical changes arise from the silencing and not the transformation protocol.  
451 Preparation of protoplasts and introduction of the dsRNA were performed as described  
452 (Grenville-Briggs et al., 2008). Fourteen days after the transfection, zoospores were collected  
453 from single colony plates and encysted. A small portion (about 200 µl) of each of the samples  
454 was used for detached leaf assays and gene expression analysis, whilst the remainder was in-  
455 cubated in plastic petri dishes at 11 °C in darkness for 16 h to induce cyst germination and  
456 appressoria formation. The number of germinated cysts, appressoria, and any aberrant struc-  
457 tures were counted using an inverted light microscope. The silenced lines were compared to  
458 the GFP control lines.

459 *Assessment of pathogenicity of the RNAi lines*

460 Pathogenicity of the RNAi lines was assessed by detached leaf assays. Healthy leaves of similar  
461 size were removed from the middle of the potato plant and placed abaxial side up in plastic  
462 boxes lined with moist paper tissue to ensure high humidity levels were maintained. Each leaf  
463 was inoculated with four 10 µl droplets of cyst solution from a single RNAi line on one side of  
464 the leaf and four 10 µl drops of the GFP-control cysts on the other side of the leaf. There were

465 four leaves inoculated for each RNAi line, two for visual assessment of pathogenicity and two  
466 for material collection for gene expression analysis (see next section). The boxes were sealed  
467 with parafilm and placed in climate chambers with a cycle of 16 h light and 8 h darkness at 18  
468 °C, starting with the dark period as described in Resjö et al. (2017). The symptoms were com-  
469 pared at 4 dpi and 7 dpi. Visual observations were complemented by leaf scans performed in  
470 Bio-Rad ChemiDoc MP Imager (Zahid et al., 2021).

471

#### 472 *Transglutaminase expression in RNAi lines*

473 To ensure sufficient amount of material for the gene expression analysis cysts produced from  
474 the RNAi lines were used to inoculate potato leaves (as described in the previous section).  
475 Eight leaf discs per sample were collected at 6 hpi and snap frozen in liquid nitrogen. The cork  
476 borer and forceps used for sample collection were washed with 70% ethanol between different  
477 lines. The RNA extraction and qRT-PCR analyses were performed as described above, using  
478 primers listed in Table 2.

#### 479 *Effect of transglutaminase inhibitor cystamine on P. infestans growth and pathogenicity*

480 To test the effect of cystamine on *P. infestans* growth, liquid medium with varying concentra-  
481 tions of cystamine ranging from 0.5 mM to 250 mM, was inoculated with small plugs of solid  
482 agar culture that were excised with a cork borer to ensure the same size for all cultures. The  
483 growth differences were estimated daily until the control culture reached the edges of the petri  
484 dish. To test if the effects of the drug were reversible the cultures containing cystamine were  
485 left in the incubator for 14 days. Additionally, a range of cystamine concentrations were added  
486 to solid rye sucrose medium and the cultures were grown until radial growth of the control  
487 cultures reached the edge of the petri dish. Solid cultures with cystamine in the medium were  
488 then used to test the effect of the drug on sporulation. The plates were flooded with cold steri-  
489 lised tap water and sporangia were collected and counted using a haemocytometer.

490 To investigate the effects of cystamine on zoospore release and motility, 12-14-day old cultures  
491 were flooded with either water or cystamine solutions at varying concentrations, and incubated  
492 at 4 °C for 4 h, after which zoospores were harvested, filtered through a 40 µm mesh and  
493 counted. Encystment was induced as described previously (Resjö et al., 2017) and samples  
494 were incubated for 2-4 h at r.t. after which cyst germination was evaluated by light microscopy.  
495 Alternatively, to assess the rate of cyst germination, 12-14-day old cultures were flooded with  
496 water, incubated at 4 °C to release zoospores, filtered and encysted. The cysts were collected  
497 by centrifugation (1200 xg, 15 min), the supernatant was removed and cysts were re-suspended  
498 in either fresh water (controls) or cystamine solution. Germination was assessed as described  
499 above, after 2-4 h incubation at r.t.

500 Finally, in order to assess appressorium formation, cysts were induced as described above,  
501 either in the presence of cystamine or treated with cystamine after encystment, incubated for  
502 16 h at 11 °C in petri dishes. Control samples were encysted as described and then treated with  
503 water. The number of cysts, germinated cysts, appressoria and any aberrant structures were  
504 counted using an inverted light microscope.

505 The effect of the cystamine treatment on *P. infestans* pathogenicity was tested with DLA as  
506 described above for RNAi. The leaves were inoculated with two droplets each containing  
507 50 000 cystamine-treated cysts on the left of the central vein and on the right side with a water-  
508 treated control cysts and additionally with just cystamine to test the effect of the drug on the  
509 potato leaf.

#### 510 *TGase* gene expression in cystamine-treated cysts

511 Leaf disc samples were collected at the inoculation site of the DLA assay (described above) at  
512 6hpi. Each sample consisted of eight leaf discs collected from three leaves. The RNA extrac-  
513 tion, DNase treatment, cDNA synthesis and qRT-PCR were performed as described above.



514 *Effect of cystamine on appressorium turgor pressure*

515 Turgor pressure of the appressoria was measured indirectly by counting the number of plasmolysed appressoria in various concentrations of PEG8000 using an incipient plasmolysis assay  
516 (Howard et al., 1991, Michel, 1983). These concentrations covered a range of osmotic pressures, which were represented using a standard curve. The turgor pressure of the cell is estimated to be the equal to the pressure at which 50 % of appressoria collapse (incipient plasmolysis). The graph and calculations were done in GraphPad Prism 8.2.1, using the standard curve  
517 interpolation. Separate curves were drawn for samples with and without cystamine.  
518  
519  
520  
521

522

523 *Transglutaminase enzymatic activity assay*

524 *P. infestans* mycelial cultures were grown in liquid pea broth medium in the presence of 10 mM  
525 cystamine and without cystamine addition (control). 3-day old cultures were blotted on sterile  
526 filter paper and ground using plastic micropestles and sterile sand. The crude extracts were  
527 assessed for the transglutaminase enzymatic activity using Abcam Transglutaminase Activity  
528 Kit (ab204700) according to manufacturer's protocol.

529 **Acknowledgements**

530 This project has received funding from the European Union's Horizon 2020 research and innovation programme under Grant Agreements No 774340 (Organic Plus) and No 766048  
531 (MSCA-ITN-2017 PROTECTA), as well as the the Swedish Research Council FORMAS  
532 (grant 2019-00881 to LGB). The authors would also like to thank Hadis Mostafanezhad for her  
533 help with microscopic observations and Kristian Persson Hodén for his input in the discussion  
534 on transglutaminase expression in *P. infestans* oospores.  
535  
536

## 537 References

- 538 AVROVA, A. O., VENTER, E., BIRCH, P. R. J. & WHISSON, S. C. 2003. Profiling and quantifying differential gene transcription in  
539 *Phytophthora infestans* prior to and during the early stages of potato infection. *Fungal Genetics and Biology*, 40, 4-14.
- 540 BENINATI, S., IORIO, R. A., TASCO, G., SERAFINI-FRACASSINI, D., CASADIO, R. & DEL DUCA, S. 2013. Expression of different  
541 forms of transglutaminases by immature cells of *Helianthus tuberosus* sprout apices. *Amino Acids*, 44, 271-283.
- 542 BRAND, A. 2012. Hyphal growth in human fungal pathogens and its role in virulence. *International journal of microbiology*, 2012, 517529-  
543 517529.
- 544 BRUNNER, F., ROSAHL, S., LEE, J., RUDD, J. J., GEILER, C., KAUPPINEN, S., RASMUSSEN, G., SCHEEL, D. & NURNBERGER,  
545 T. 2002. Pep-13, a plant defense-inducing pathogen-associated pattern from *Phytophthora* transglutaminases. *Embo j*, 21, 6681-8.
- 546 CATEN, C. E. & JINKS, J. L. 1968. Spontaneous variability of single isolates of *Phytophthora infestans*. I. Cultural variation. *Canadian*  
547 *Journal of Botany*, 46, 329-348.
- 548 ECKERT, R. L., KAARTINEN, M. T., NURMINSKAYA, M., BELKIN, A. M., COLAK, G., JOHNSON, G. V. W. & MEHTA, K. 2014.  
549 Transglutaminase Regulation of Cell Function. *Physiological Reviews*, 94, 383-417.
- 550 FABRITIUS, A. L. & JUDELSON, H. S. 2003. A mating-induced protein of *Phytophthora infestans* is a member of a family of elicitors with  
551 divergent structures and stage-specific patterns of expression. *Mol Plant Microbe Interact*, 16, 926-35.
- 552 FOLK, J. E. 1980. Transglutaminases. *Annu Rev Biochem*, 49, 517-31.
- 553 FOLK, J. E. & COLE, P. W. 1966. Mechanism of action of guinea pig liver transglutaminase. I. Purification and properties of the enzyme:  
554 identification of a functional cysteine essential for activity. *J Biol Chem*, 241, 5518-25.
- 555 GIORDANO, D. & FACCHIANO, A. 2019. Classification of microbial transglutaminases by evaluation of evolution trees, sequence motifs,  
556 secondary structure topology and conservation of potential catalytic residues. *Biochemical and Biophysical Research*  
557 *Communications*, 509, 506-513.
- 558 GRENVILLE-BRIGGS, L. J., ANDERSON, V. L., FUGELSTAD, J., AVROVA, A. O., BOUZENZANA, J., WILLIAMS, A., WAWRA, S.,  
559 WHISSON, S. C., BIRCH, P. R. J., BULONE, V. & VAN WEST, P. 2008. Cellulose Synthesis in *Phytophthora infestans* Is  
560 Required for Normal Appressorium Formation and Successful Infection of Potato. *The Plant Cell*, 20, 720-738.
- 561 GRENVILLE-BRIGGS, L. J., AVROVA, A. O., HAY, R. J., BRUCE, C. R., WHISSON, S. C. & VAN WEST, P. 2010. Identification of  
562 appressorial and mycelial cell wall proteins and a survey of the membrane proteome of *Phytophthora infestans*. *Fungal Biology*,  
563 114, 702-723.
- 564 GUO, J., CHEN, S., HUANG, C., CHEN, L., STUDHOLME, D. J., ZHAO, S. & YU, L. 2004. MANSC: a seven-cysteine-containing domain  
565 present in animal membrane and extracellular proteins. *Trends in Biochemical Sciences*, 29, 172-174.
- 566 HAHLBROCK, K., SCHEEL, D., LOGEMANN, E., NURNBERGER, T., PARNISKE, M., REINOLD, S., SACKS, W. R. & SCHMELZER,  
567 E. 1995. Oligopeptide elicitor-mediated defense gene activation in cultured parsley cells. *Proc Natl Acad Sci U S A*, 92, 4150-7.
- 568 HOWARD, R. J., FERRARI, M. A., ROACH, D. H. & MONEY, N. P. 1991. Penetration of hard substrates by a fungus employing enormous  
569 turgor pressures. *Proc Natl Acad Sci U S A*, 88, 11281-4.
- 570 ICEKSON, I. & APELBAUM, A. 1987. Evidence for transglutaminase activity in plant tissue. *Plant physiology*, 84, 972-974.
- 571 IRANZO, M., AGUADO, C., PALLOTTI, C., CANIZARES, J. V. & MORMENEO, S. 2002. Transglutaminase activity is involved in  
572 *Saccharomyces cerevisiae* wall construction. *Microbiology*, 148, 1329-34.
- 573 JEITNER, T. M., PINTO, J. T. & COOPER, A. J. L. 2018. Cystamine and cysteamine as inhibitors of transglutaminase activity in vivo.  
574 *Bioscience reports*, 38, BSR20180691.
- 575 JONES, P., BINNS, D., CHANG, H. Y., FRASER, M., LI, W., MCANULLA, C., MCWILLIAM, H., MASLEN, J., MITCHELL, A., NUKA,  
576 G., PESSEAT, S., QUINN, A. F., SANGRADOR-VEGAS, A., SCHEREMETJEW, M., YONG, S. Y., LOPEZ, R. & HUNTER,  
577 S. 2014. InterProScan 5: genome-scale protein function classification. *Bioinformatics*, 30, 1236-40.
- 578 KIELISZEK, M. & MISIEWICZ, A. 2014. Microbial transglutaminase and its application in the food industry. A review. *Folia*  
579 *microbiologica*, 59, 241-250.
- 580 KUMAR, S., STECHER, G., LI, M., KNYAZ, C. & TAMURA, K. 2018. MEGA X: Molecular Evolutionary Genetics Analysis across  
581 Computing Platforms. *Mol Biol Evol*, 35, 1547-1549.
- 582 LORAND, L. & GRAHAM, R. M. 2003. Transglutaminases: crosslinking enzymes with pleiotropic functions. *Nature Reviews Molecular*  
583 *Cell Biology*, 4, 140-156.
- 584 MADEIRA, F., PARK, Y. M., LEE, J., BUSO, N., GUR, T., MADHUSOODANAN, N., BASUTKAR, P., TIVEY, A. R. N., POTTER, S.  
585 C., FINN, R. D. & LOPEZ, R. 2019. The EMBL-EBI search and sequence analysis tools APIs in 2019. *Nucleic acids research*,  
586 47, W636-W641.
- 587 MAKAROVA, K. S., ARAVIND, L. & KOONIN, E. V. 1999. A superfamily of archaeal, bacterial, and eukaryotic proteins homologous to  
588 animal transglutaminases. *Protein Science*, 8, 1714-1719.
- 589 MARTINS, I. M., MATOS, M., COSTA, R., SILVA, F., PASCOAL, A., ESTEVINHO, L. M. & CHOUPINA, A. B. 2014. Transglutaminases:  
590 recent achievements and new sources. *Applied Microbiology and Biotechnology*, 98, 6957-6964.
- 591 MENG, S., TORTO-ALALIBO, T., CHIBUCOS, M. C., TYLER, B. M. & DEAN, R. A. 2009. Common processes in pathogenesis by fungal  
592 and oomycete plant pathogens, described with Gene Ontology terms. *BMC microbiology*, 9 Suppl 1, S7-S7.
- 593 MICHEL, B. E. 1983. Evaluation of the water potentials of solutions of polyethylene glycol 8000 both in the absence and presence of other  
594 solutes. *Plant Physiol*, 72, 66-70.
- 595 MONEY, N. P. 1990. Measurement of hyphal turgor. *Experimental Mycology*, 14, 416-425.
- 596 NIU, X., AH-FONG, A. M. V., LOPEZ, L. A. & JUDELSON, H. S. 2018. Transcriptomic and proteomic analysis reveals wall-associated and  
597 glucan-degrading proteins with potential roles in *Phytophthora infestans* sexual spore development. *PLoS one*, 13, e0198186-  
598 e0198186.
- 599 NURNBERGER, T., NENNSTIEL, D., JABS, T., SACKS, W. R., HAHLBROCK, K. & SCHEEL, D. 1994. High affinity binding of a fungal  
600 oligopeptide elicitor to parsley plasma membranes triggers multiple defense responses. *Cell*, 78, 449-460.
- 601 REISS, K., KIRCHNER, E., GIJZEN, M., ZOCHER, G., LÖFFELHARDT, B., NURNBERGER, T., STEHLE, T. & BRUNNER, F. 2011.  
602 Structural and phylogenetic analyses of the GP42 transglutaminase from *Phytophthora sojae* reveal an evolutionary relationship  
603 between oomycetes and marine *Vibrio* bacteria. *The Journal of biological chemistry*, 286, 42585-42593.
- 604 RESJÖ, S., BRUS, M., ALI, A., MEIJER, H. J. G., SANDIN, M., GOVERS, F., LEVANDER, F., GRENVILLE-BRIGGS, L. &  
605 ANDREASSON, E. 2017. Proteomic Analysis of *Phytophthora infestans* Reveals the Importance of Cell Wall Proteins in  
606 Pathogenicity. *Molecular & Cellular Proteomics*, 16, 1958-1971.
- 607 REYNA-BELTRÁN, E., ISAAC BAZÁN MÉNDEZ, C., IRANZO, M., MORMENEO, S. & PEDRO LUNA-ARIAS, J. 2019. The Cell Wall  
608 of *Candida albicans*: A Proteomics View.

- 609 RUIZ-HERRERA, J., IRANZO, M., ELORZA, M. V., SENTANDREU, R. & MORMENEO, S. 1995. Involvement of transglutaminase in  
610 the formation of covalent cross-links in the cell wall of *Candida albicans*. *Arch Microbiol*, 164, 186-93.
- 611 SARKAR, N. K., CLARKE, D. D. & WAELSCH, H. 1957. An enzymically catalyzed incorporation of amines into proteins. *Biochim Biophys*  
612 *Acta*, 25, 451-2.
- 613 SERAFINI-FRACASSINI, D. & DEL DUCA, S. 2008. Transglutaminases: widespread cross-linking enzymes in plants. *Ann Bot*, 102, 145-  
614 52.
- 615 TZELEPIS, G., HODÉN, K. P., FOGELQVIST, J., ÅSMAN, A. K. M., VETUKURI, R. R. & DIXELIUS, C. 2020. Dominance of Mating  
616 Type A1 and Indication of Epigenetic Effects During Early Stages of Mating in *Phytophthora infestans*. *Frontiers in microbiology*,  
617 11, 252-252.
- 618 WANG, Z. Y., JENKINSON, J. M., HOLCOMBE, L. J., SOANES, D. M., VENEALTY-FOURREY, C., BHAMBRA, G. K. & TALBOT,  
619 N. J. 2005. The molecular biology of appressorium turgor generation by the rice blast fungus *Magnaporthe grisea*. *Biochem Soc*  
620 *Trans*, 33, 384-8.
- 621 ZAHID, M. A., SANDRONI, M., VETUKURI, R. R. & ANDREASSON, E. 2021. A fast, nondestructive method for the detection of disease-  
622 related lesions and wounded leaves. *BioTechniques*, 71, 425-430.
- 623 ZHONG, M., WANG, Y., ZHANG, Y., SHU, S., SUN, J. & GUO, S. 2019. Overexpression of Transglutaminase from Cucumber in Tobacco  
624 Increases Salt Tolerance through Regulation of Photosynthesis. *International journal of molecular sciences*, 20, 894.
- 625
